# Supplementary material for: Association of vWA and TPOX Polymorphisms with Venous Thrombosis in Mexican Mestizos
Source: Hindawi journal article supplement (doi:10.1155/2014/697689), 2014-01-01
Supplement: f1 [file 697689.f1.pdf]

## Supplemental Material

Genotypic statistical differences between cases and controls

| Locus       | Genotypes | Cases      | Controls    | <i>P</i>        | Odd's ratio (95% CI)      |
|-------------|-----------|------------|-------------|-----------------|---------------------------|
| v<br>W<br>A | 11,11     | 0.006 (1)  | 0           | ≥ 0.05          | -                         |
|             | 11,12     | 0.011 (2)  | 0           | ≥ 0.05          | -                         |
|             | 13,16     | 0          | 0.002 (1)   | ≥ 0.05          | -                         |
|             | 13,17     | 0          | 0.006 (3)   | ≥ 0.05          | -                         |
|             | 13,18     | 0          | 0.002 (1)   | ≥ 0.05          | -                         |
|             | 14,14     | 0          | 0.009 (5)   | ≥ 0.05          | -                         |
|             | 14,15     | 0.006 (1)  | 0.023 (12)  | ≥ 0.05          | 0.25 (0.01 - 1.83)        |
|             | 14,16     | 0.073 (13) | 0.026 (14)  | <b>0.004</b>    | <b>2.93 (1.27 - 6.76)</b> |
|             | 14,17     | 0.011 (2)  | 0.034 (18)  | ≥ 0.05          | 0.33 (0.05 - 1.48)        |
|             | 14,18     | 0.034 (6)  | 0.009 (5)   | <b>0.03</b>     | 3.69 (0.98 - 14.12)       |
|             | 14,19     | 0.006 (1)  | 0.006 (3)   | ≥ 0.05          | 1                         |
|             | 14,20     | 0          | 0.002 (1)   | ≥ 0.05          | -                         |
|             | 15,15     | 0.028 (5)  | 0.006 (3)   | <b>0.03</b>     | 5.12 (1.06 -27.26)        |
|             | 15,16     | 0.051 (9)  | 0.064 (34)  | ≥ 0.05          | 0.78 (0.34 - 1.74)        |
|             | 15,17     | 0.062 (11) | 0.058 (31)  | ≥ 0.05          | 1.07 (0.49 - 2.27)        |
|             | 15,18     | 0.023 (4)  | 0.026 (14)  | ≥ 0.05          | 0.85 (0.23 - 2.82)        |
|             | 15,19     | 0          | 0.011 (6)   | ≥ 0.05          | -                         |
|             | 15.2, 17  | 0          | 0.002 (1)   | ≥ 0.05          | -                         |
|             | 16,16     | 0.102 (18) | 0.087 (46)  | ≥ 0.05          | 1.19 (0.65 - 2.19)        |
|             | 16,17     | 0.153 (27) | 0.194 (103) | ≥ 0.05          | 0.75 (0.46 - 1.22)        |
|             | 16,18     | 0.113 (20) | 0.105 (56)  | ≥ 0.05          | 1.08 (0.61 - 1.91)        |
|             | 16,19     | 0.017 (3)  | 0.036 (19)  | ≥ 0.05          | 0.46 (0.11 - 1.68)        |
|             | 16,20     | 0          | 0.006 (3)   | ≥ 0.05          | -                         |
|             | 17,17     | 0.085 (15) | 0.090 (48)  | ≥ 0.05          | 0.93 (0.48 - 1.77)        |
|             | 17,18     | 0.079 (14) | 0.092 (49)  | ≥ 0.05          | 0.75 (0.38 - 1.45)        |
|             | 17,19     | 0.017 (3)  | 0.053 (28)  | <b>0.043</b>    | 0.31 (0.07 - 1.08)        |
|             | 17,20     | 0.011 (2)  | 0.004 (2)   | ≥ 0.05          | 3.02 (0.30 - 30.18)       |
|             | 18,18     | 0.079 (14) | 0.008 (4)   | <b>≤ 0.0001</b> | 11.32 (3.42 - 41. 29)     |
|             | 18,19     | 0.023 (4)  | 0.028 (15)  | ≥ 0.05          | 0.80 (0.22 - 2.60)        |
|             | 18,20     | 0.006 (1)  | 0           | ≥ 0.05          | -                         |
|             | 19,19     | 0.006 (1)  | 0.009 (5)   | ≥ 0.05          | 0.60 (0.03 - 5.28)        |
|             | 20,20     | 0          | 0.002 (1)   | ≥ 0.05          | -                         |

| Locus            | Genotypes | Cases      | Controls    | P               | Odd's ratio (95%CI)        |
|------------------|-----------|------------|-------------|-----------------|----------------------------|
| T<br>P<br>O<br>X | 6,8       | 0          | 0.002 (1)   | ≥ 0.05          | -                          |
|                  | 6,9,3     | 0          | 0.002 (1)   | ≥ 0.05          | -                          |
|                  | 7,7       | 0          | 0.002 (1)   | ≥ 0.05          | -                          |
|                  | 7,8       | 0          | 0.008 (4)   | ≥ 0.05          | -                          |
|                  | 7,9       | 0.011 (2)  | 0.006 (3)   | ≥ 0.05          | 2.01 (0.23- 14.87)         |
|                  | 7,10      | 0          | 0.002 (1)   | ≥ 0.05          | -                          |
|                  | 7,11      | 0          | 0.002 (1)   | ≥ 0.05          | -                          |
|                  | 8,8       | 0.073 (13) | 0.275 (146) | ≤ <b>0.0001</b> | <b>0.21 (0.11 - 0.39)</b>  |
|                  | 8,9       | 0.034 (6)  | 0.060 (32)  | ≥ 0.05          | 0.55 (0.20 - 1.40)         |
|                  | 8,10      | 0.034 (6)  | 0.047 (25)  | ≥ 0.05          | 0.71 (0.26 - 1.86)         |
|                  | 8,11      | 0.090 (16) | 0.224 (119) | ≤ <b>0.0001</b> | <b>0.34 (0.19 - 0.61)</b>  |
|                  | 8,12      | 0.017 (3)  | 0.122 (65)  | ≤ <b>0.0001</b> | 0.12 (0.03 - 0.41)         |
|                  | 8,13      | 0.006 (1)  | 0.002 (1)   | ≥ 0.05          | 3.01 (0 - 110.59)          |
|                  | 9,9       | 0.175 (31) | 0.004 (2)   | ≤ <b>0.0001</b> | 56.16 (12.90 - 343.46)     |
|                  | 9,10      | 0.062 (11) | 0.008 (4)   | ≤ <b>0.0001</b> | 8.73 (2.53 - 32.96)        |
|                  | 9,11      | 0.034 (6)  | 0.038 (20)  | ≥ 0.05          | 0.90 (0.32 - 2.41)         |
|                  | 9,12      | 0.147 (26) | 0.009 (5)   | ≤ <b>0.0001</b> | 18.11 (6.47 - 54.73)       |
|                  | 9,13      | 0.023 (4)  | 0           | ≥ 0.05          | -                          |
|                  | 9,14      | 0.006 (1)  | 0           | ≥ 0.05          | -                          |
|                  | 10,10     | 0.006 (1)  | 0.004 (2)   | ≥ 0.05          | 1.50 (-)                   |
|                  | 10,11     | 0.011 (2)  | 0.024 (13)  | ≥ 0.05          | 0.46 (0.07 - 2.14)         |
|                  | 10,12     | 0.028 (5)  | 0.011 (6)   | ≥ 0.05          | 2.54 (0.67 - 9.54)         |
|                  | 10,13     | 0.011 (2)  | 0           | ≥ 0.05          | -                          |
|                  | 11,11     | 0.068 (12) | 0.070 (37)  | ≥ 0.05          | 0.97 (0.47 - 1.98)         |
|                  | 11,12     | 0.028 (5)  | 0.064 (34)  | ≥ 0.05          | 0.42 (0.14 - 1.16)         |
|                  | 11,13     | 0.011 (2)  | 0           | ≥ 0.05          | -                          |
|                  | 12,12     | 0.073 (13) | 0.015 (8)   | ≤ <b>0.0001</b> | <b>5.18 (1.97 - 13.93)</b> |
|                  | 12,13     | 0.040 (7)  | 0           | ≥ 0.05          | -                          |
| 13,13            | 0.011 (2) | 0          | ≥ 0.05      | -               |                            |

| Locus | Genotypes  | Cases     | Controls   | P             | Odd's ratio (95%CI)       |
|-------|------------|-----------|------------|---------------|---------------------------|
|       | 17,20      | 0.006 (1) | 0          | ≥ 0.05        | -                         |
|       | 17,21      | 0         | 0.002 (1)  | ≥ 0.05        | -                         |
|       | 17,26      | 0.006 (1) | 0          | ≥ 0.05        | -                         |
|       | 17,27      | 0.006 (1) | 0          | ≥ 0.05        | -                         |
|       | 18,18      | 0         | 0.002 (1)  | ≥ 0.05        | -                         |
|       | 18,19      | 0         | 0.004 (2)  | ≥ 0.05        | -                         |
|       | 18,20      | 0.006 (1) | 0          | ≥ 0.05        | -                         |
|       | 18,21      | 0         | 0.002 (1)  | ≥ 0.05        | -                         |
|       | 18,23      | 0         | 0.002 (1)  | ≥ 0.05        | -                         |
|       | 18,26      | 0         | 0.002 (1)  | ≥ 0.05        | -                         |
|       | 18,27      | 0         | 0.002 (1)  | ≥ 0.05        | -                         |
|       | 18.2,22    | 0         | 0.002 (1)  | ≥ 0.05        | -                         |
|       | 19,19      | 0         | 0.002 (1)  | ≥ 0.05        | -                         |
|       | 19,20      | 0         | 0.015 (8)  | ≥ 0.05        | -                         |
|       | 19,21      | 0.011 (2) | 0.023 (12) | ≥ 0.05        | 0.49 (0.08 - 2.35)        |
|       | 19,22      | 0.006 (1) | 0.019 (10) | ≥ 0.05        | 0.30 (0.01 - 2.26)        |
|       | 19,23      | 0.006 (1) | 0.023 (12) | ≥ 0.05        | 0.25 (0.01 - 1.83)        |
|       | 19,23.2    | 0         | 0.002 (1)  | ≥ 0.05        | -                         |
|       | 19,24      | 0.023 (4) | 0.023 (12) | ≥ 0.05        | 1.00 (0.27 - 3.39)        |
|       | 19,25      | 0         | 0.019 (10) | ≥ 0.05        | -                         |
|       | 19,26      | 0         | 0.017 (9)  | ≥ 0.05        | -                         |
|       | 19,27      | 0.006 (1) | 0.008 (4)  | ≥ 0.05        | 0.75 (0.03 - 7.12)        |
|       | 19,2.22    | 0         | 0.002 (1)  | ≥ 0.05        | -                         |
|       | 20,20      | 0.006 (1) | 0.006 (3)  | ≥ 0.05        | 1.00 (-)                  |
|       | 20,21      | 0.028 (5) | 0.030 (16) | ≥ 0.05        | 0.94 (0.30 - 2.77)        |
|       | 20,22      | 0.017 (3) | 0.017 (9)  | ≥ 0.05        | 1.00 (0.21 - 4.07)        |
|       | 20,23      | 0.017 (3) | 0.023 (12) | ≥ 0.05        | 0.75 (0.17 - 2.87)        |
|       | 20,24      | 0.017 (3) | 0.028 (15) | ≥ 0.05        | 0.59 (0.13 - 2.21)        |
|       | 20,25      | 0.045 (8) | 0.030 (16) | ≥ 0.05        | <b>1.52 (0.59 - 3.86)</b> |
|       | 20,26      | 0.028 (5) | 0.013 (7)  | ≥ 0.05        | 2.18 (0.59 - 7.74)        |
|       | 20,27      | 0.006 (1) | 0          | ≥ 0.05        | -                         |
|       | 20,28      | 0.006 (1) | 0          | ≥ 0.05        | -                         |
|       | 21,21      | 0.006 (1) | 0.009 (5)  | ≥ 0.05        | 0.60 (0.03 - 5.28)        |
|       | 21,22      | 0.023 (4) | 0.034 (18) | ≥ 0.05        | 0.66 (0.19 - 2.10)        |
|       | 22,23      | 0.017 (3) | 0.028 (15) | ≥ 0.05        | 0.59 (0.13 - 2.21)        |
|       | 21,24      | 0.034 (6) | 0.045 (24) | ≥ 0.05        | 0.74 (0.27 - 1.95)        |
|       | 21,25      | 0.045 (8) | 0.041 (22) | ≥ 0.05        | 1.10 (0.44 - 2.65)        |
|       | 21,26      | 0.028 (5) | 0.021 (11) | ≥ 0.05        | 1.37 (0.41 - 4.35)        |
|       | 21,27      | 0.023 (4) | 0.006 (3)  | <b>0.048</b>  | 4.07 (0.76 - 21.09)       |
|       | 21,28      | 0         | 0.002 (1)  | ≥ 0.05        | -                         |
|       | 21,30.2    | 0.006 (1) | 0          | ≥ 0.05        | -                         |
|       | 21.2, 23.2 | 0         | 0.002 (1)  | ≥ 0.05        | -                         |
|       | 21.2,24    | 0         | 0.002 (1)  | ≥ 0.05        | -                         |
|       | 21.2,24.2  | 0         | 0.002 (1)  | ≥ 0.05        | -                         |
|       | 21.2,26    | 0         | 0.002 (1)  | ≥ 0.05        | -                         |
|       | 22,22      | 0.011 (2) | 0.024 (13) | ≥ 0.05        | 0.46 (0.07 - 2.14)        |
|       | 22,23      | 0.023 (4) | 0.036 (19) | ≥ 0.05        | 0.62 (0.18 - 1.97)        |
|       | 22,24      | 0.040 (7) | 0.060 (32) | ≥ 0.05        | 0.64 (0.25 - 1.56)        |
|       | 22,25      | 0.028 (5) | 0.034 (18) | ≥ 0.05        | 0.83 (0.27 - 2.41)        |
|       | 22,26      | 0.034 (6) | 0.008 (4)  | <b>0.01</b>   | 4.62 (1.14 - 19.72)       |
|       | 22,27      | 0.028 (5) | 0.002 (1)  | <b>0.0009</b> | 15.41 (1.75 - 350.92)     |
|       | 23,23      | 0.017 (3) | 0.026 (14) | ≥ 0.05        | 0.64 (0.14 - 2.40)        |
|       | 23,23.2    | 0         | 0.002 (1)  | ≥ 0.05        | -                         |
|       | 23,24      | 0.023 (4) | 0.032 (17) | ≥ 0.05        | 0.52 (0.12 - 1.92)        |
|       | 23,25      | 0.051 (9) | 0.041 (22) | ≥ 0.05        | <b>1.24 (0.52 - 2.89)</b> |
|       | 23,26      | 0.006 (1) | 0.034 (18) | <b>0.044</b>  | 0.16 (0.01 - 1.16)        |
|       | 23,27      | 0.028 (5) | 0.004 (2)  | <b>0.004</b>  | 7.69 (1.31 - 57.70)       |
|       | 23,28      | 0         | 0.002 (1)  | ≥ 0.05        | -                         |
|       | 23,2.24    | 0         | 0.002 (1)  | ≥ 0.05        | -                         |
|       | 23,2.26    | 0         | 0.002 (1)  | ≥ 0.05        | -                         |
|       | 24,24      | 0.028 (5) | 0.023 (12) | ≥ 0.05        | 1.26 (0.38 - 3.91)        |
|       | 24,25      | 0.023 (4) | 0.051 (27) | ≥ 0.05        | 0.43 (0.13 - 1.32)        |
|       | 24,26      | 0.040 (7) | 0.021 (11) | ≥ 0.05        | <b>1.95 (0.67 - 5.52)</b> |
|       | 24,26.2    | 0.006 (1) | 0.002 (1)  | ≥ 0.05        | 3.01 (0.00 - 110.59)      |
|       | 24,27      | 0.006 (1) | 0.008 (4)  | ≥ 0.05        | 0.75 (0.03 - 7.12)        |
|       | 24,28      | 0.006 (1) | 0.004 (2)  | ≥ 0.05        | 1.50 (-)                  |
|       | 24.2,25.2  | 0         | 0.002 (1)  | ≥ 0.05        | -                         |
|       | 24.2,26    | 0         | 0.002 (1)  | ≥ 0.05        | -                         |
|       | 24.2,26.2  | 0         | 0.002 (1)  | ≥ 0.05        | -                         |
|       | 24.2,27.2  | 0         | 0.002 (1)  | ≥ 0.05        | -                         |
|       | 25,25      | 0         | 0.024 (13) | ≥ 0.05        | -                         |
|       | 25,26      | 0.034 (6) | 0.024 (13) | ≥ 0.05        | 1.40 (0.47 - 4.02)        |
|       | 25,26.2    | 0.017 (3) | 0          | ≥ 0.05        | -                         |
|       | 25,27      | 0.040 (7) | 0.008 (4)  | <b>0.002</b>  | 5.43 (1.41 - 22.31)       |
|       | 25,28      | 0.011 (2) | 0.002 (1)  | ≥ 0.05        | 6.06 (0.43 - 169.64)      |
|       | 26,26      | 0.017 (3) | 0.002 (1)  | <b>0.02</b>   | 9.14 (0.85 - 229.37)      |
|       | 26,27      | 0.017 (3) | 0.004 (2)  | ≥ 0.05        | 4.56 (0.62 - 39.25)       |
|       | 26,28      | 0.017 (3) | 0.002 (1)  | <b>0.02</b>   | 9.14 (0.85 - 229.37)      |
|       | 26,30.2    | 0.006 (1) | 0          | ≥ 0.05        | -                         |
|       | 26.2,27    | 0.006 (1) | 0          | ≥ 0.05        | -                         |
|       | 27,27      | 0.006 (1) | 0.002 (1)  | ≥ 0.05        | 3.01 (0.00 - 110.59)      |
|       | 28,28      | 0.011 (2) | 0          | ≥ 0.05        | -                         |

F  
G  
A
